# Supplementary material
Source: PubMed Central journal article supplement (PMC5905947)
Supplement: Supp_Fig1.pdf [file Supp_Fig1.pdf]

## Supplemental Data

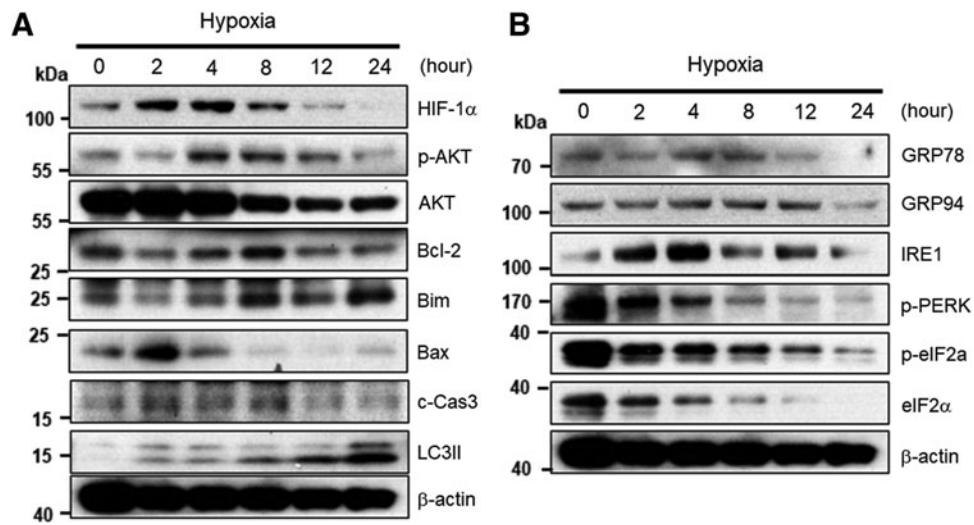

**SUPPLEMENTARY FIG. S1. Expression of apoptotic and unfolded protein response-related protein in hypoxia-induced human islets.** (A) Protein expression of apoptosis-related and (B) unfolded protein response-related proteins analyzed by Western blot. Data are representative of at least three independent experiments.
