# Supplementary material
Source: PubMed Central journal article supplement (PMC5905947)
Supplement: Supp_Fig2.pdf [file Supp_Fig2.pdf]

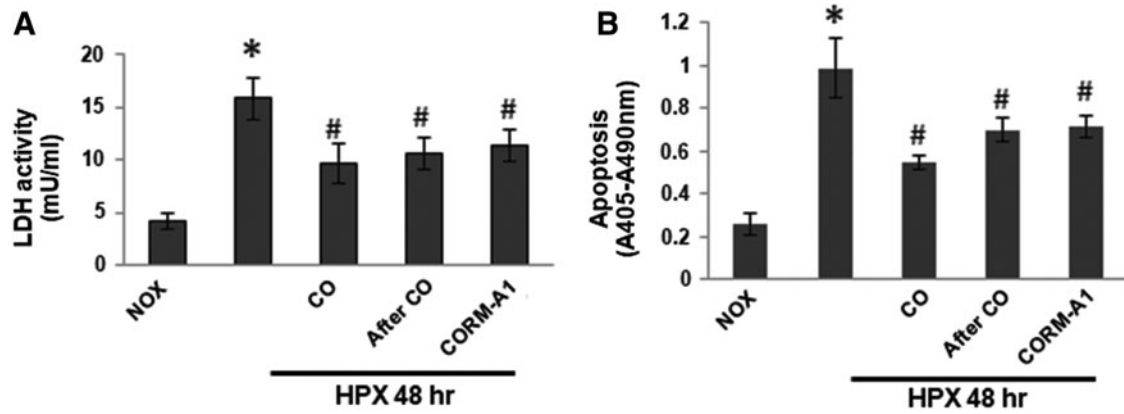

**SUPPLEMENTARY FIG. S2. Cell death in mouse islets cultured in normoxic (NOX) or hypoxic (HPX) conditions.** Mouse islets were cultured for 48 h in normoxic or hypoxic (1% O<sub>2</sub>) conditions with or without CO, or after CO and CORM A1 (20 mM). Cell death was measured by LDH assay (A) and cytoplasmic histone-associated DNA fragments (B) CO: CO bubbled buffer was used throughout the islet isolation procedure, and islets were cultured in a CO chamber with 250 ppm CO. After CO: islets were cultured in a CO chamber after isolation. \**p* < 0.05 versus Con, #*p* < 0.05 versus HPX, one-way ANOVA. CO, carbon monoxide; CORM, CO-releasing molecule; HPX, hypoxia; LDH, lactate dehydrogenase; NOX, normoxia.
