# Supplementary material
Source: PubMed Central journal article supplement (PMC5905947)
Supplement: Supp_Fig3.pdf [file Supp_Fig3.pdf]

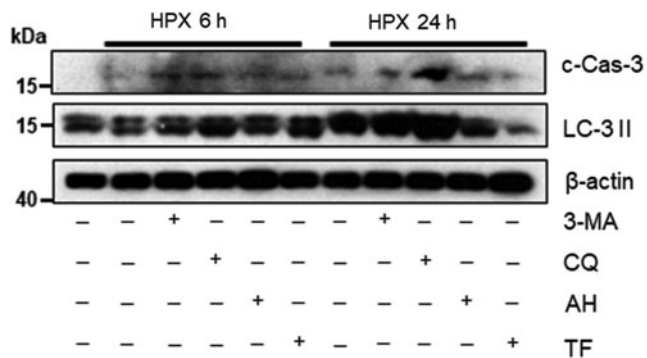

**SUPPLEMENTARY FIG. S3. Autophagy inhibition and induction in hypoxia-induced human islet cells death.** Human islets were cultured under normoxic or hypoxic conditions with or without autophagy inducers (AH or TF) or autophagy inhibitors (3-MA or CQ) for 6 or 24 h. Expression levels of c-Cas-3 and LC3-II were measured by Western blot. Data are representative of at least three individual experiments. 3-MA, 3-methyladenine; AH, amiodarone hydrochloride; c-Cas-3, cleaved-Caspase-3; CQ, chloroquine; TF, trifluoperazine.
