# Supplementary material
Source: PubMed Central journal article supplement (PMC5905947)
Supplement: Supp_Fig5.pdf [file Supp_Fig5.pdf]

**A**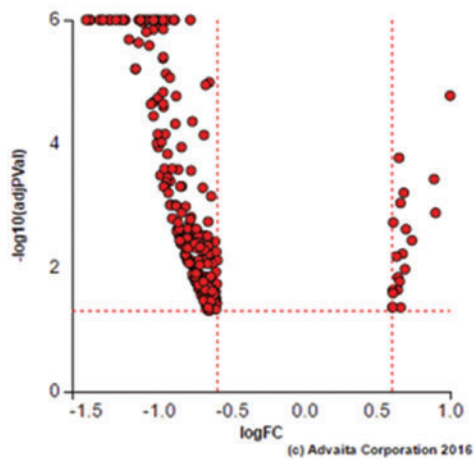

Organism: Homo sapiens

Differentially Expressed (DE) genes: 253

All genes with measured expression: 492

DE thresholds:

- fold change: 0.6
- p-value: 0.05

**C**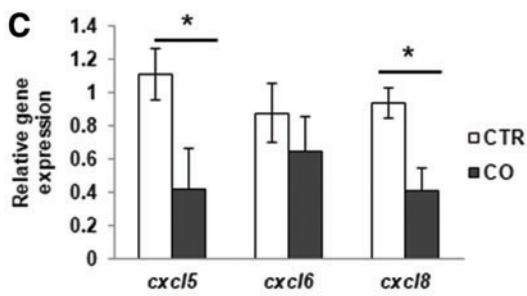**B**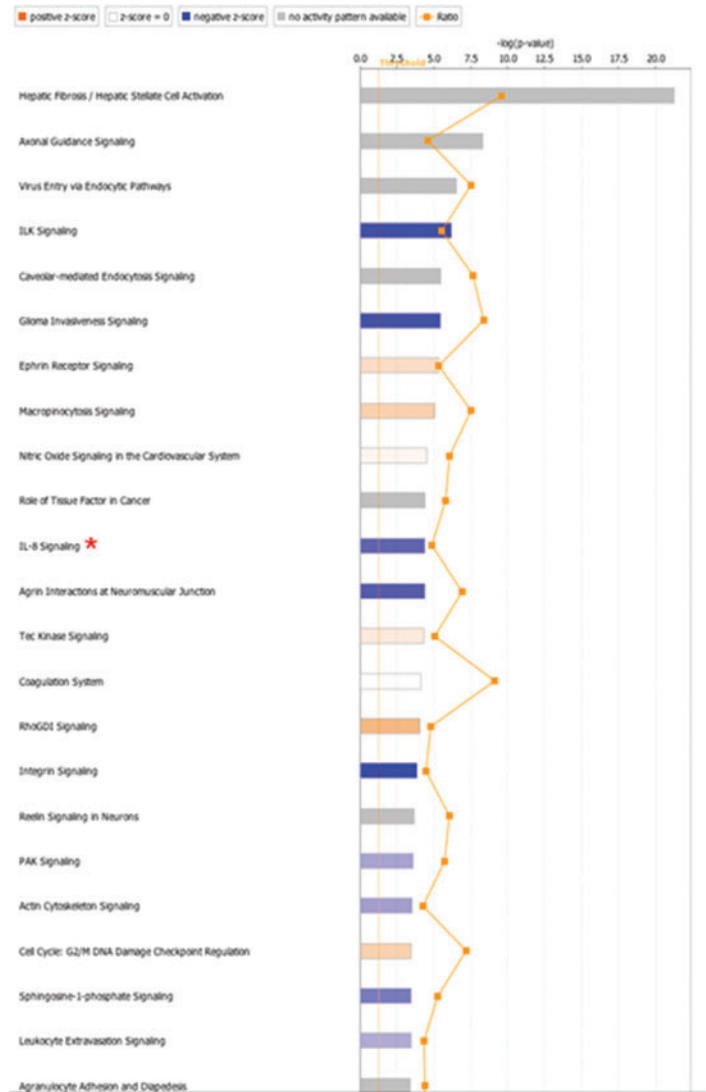

**SUPPLEMENTARY FIG. S5. Volcano plot and pathway enrichment analysis from control and CO-treated islets harvested 3 days post-transplantation.** (A) X—The logarithm of the fold change. Y—The negative base 10 logarithm of the *p*-value. The red-dotted lines represent the threshold. (B) Pathway enrichment analysis of the modulations in CO versus control islets. Each bar represents an enriched pathway with significance determined using Benjamini–Hochberg hypothesis-corrected *p*-values. (C) Relative mRNA expression of genes in control or CO human islet grafts at 3 days post-transplantation. \**p* < 0.05, Student's *t*-test.
