# Supplementary material
Source: PubMed Central journal article supplement (PMC5905947)

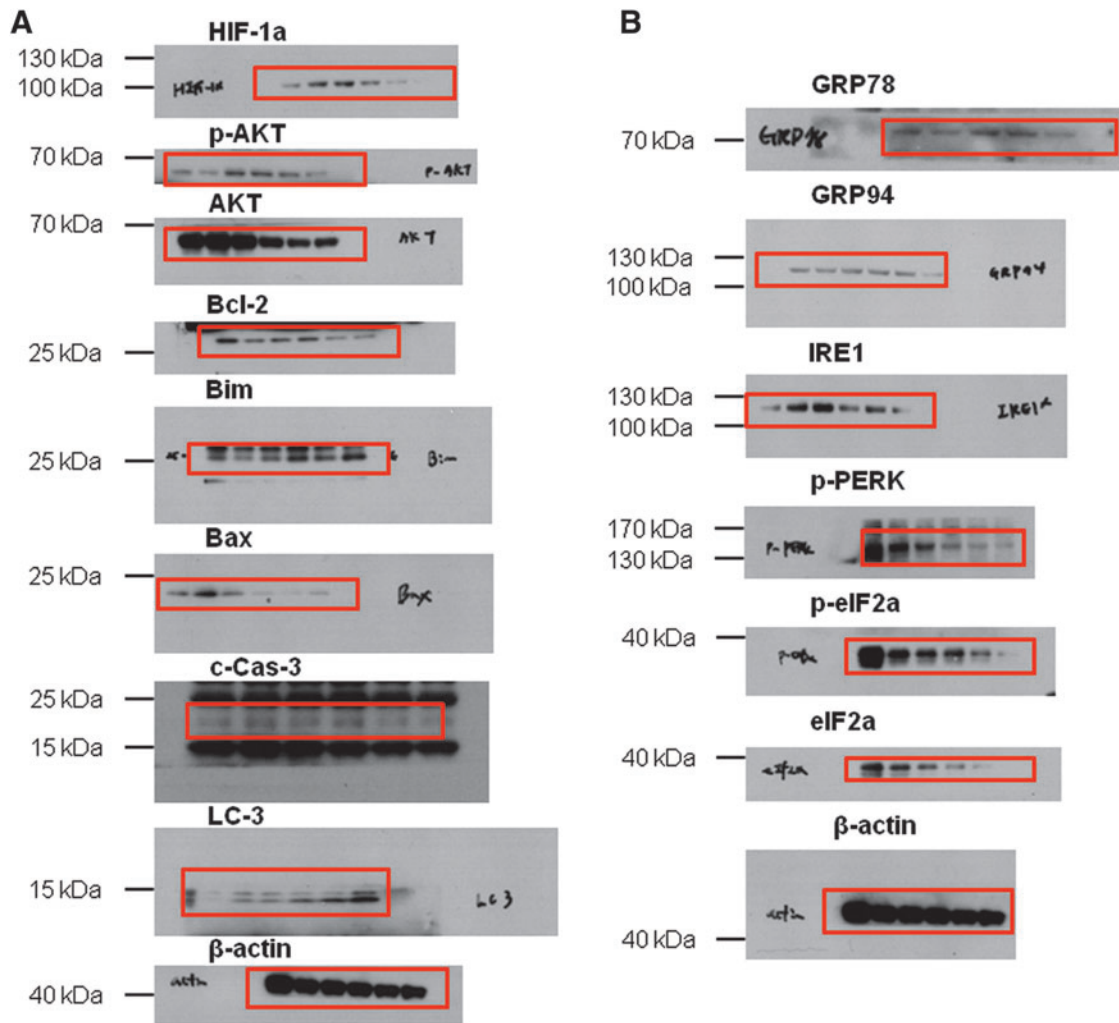

**SUPPLEMENTARY FIG. S11.** Unedited blots for Supplementary Figure S1A and B.

Supplement: Supp_Fig11.pdf [file Supp_Fig11.pdf]

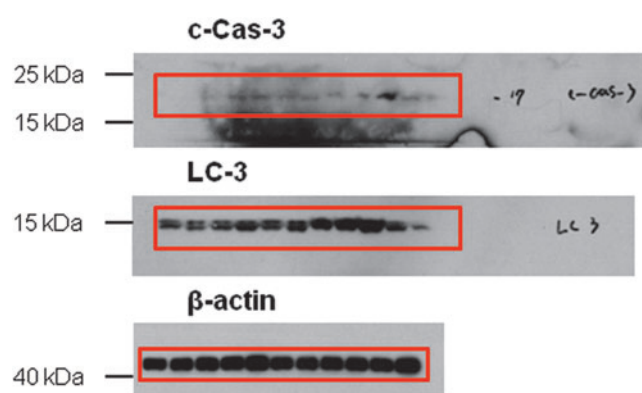

**SUPPLEMENTARY FIG. S12.** Unedited blots for Supplementary Figure S3.

Supplement: Supp_Fig12.pdf [file Supp_Fig12.pdf]

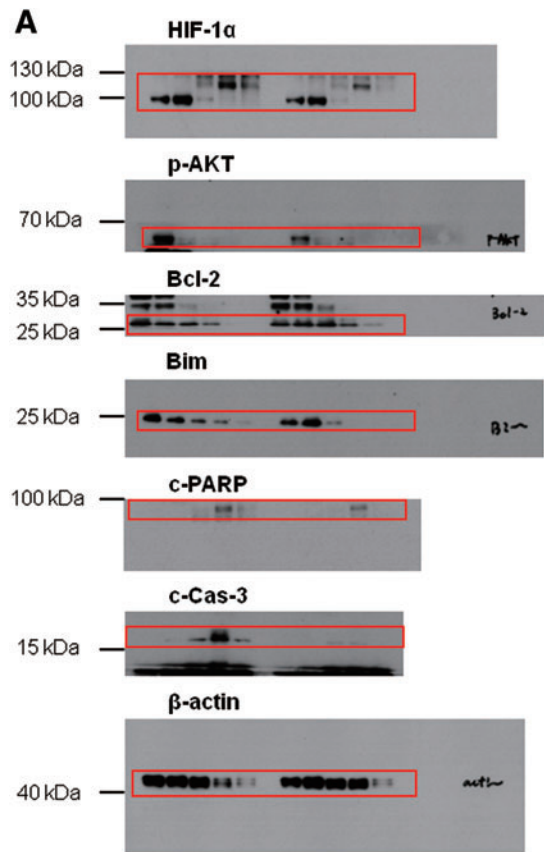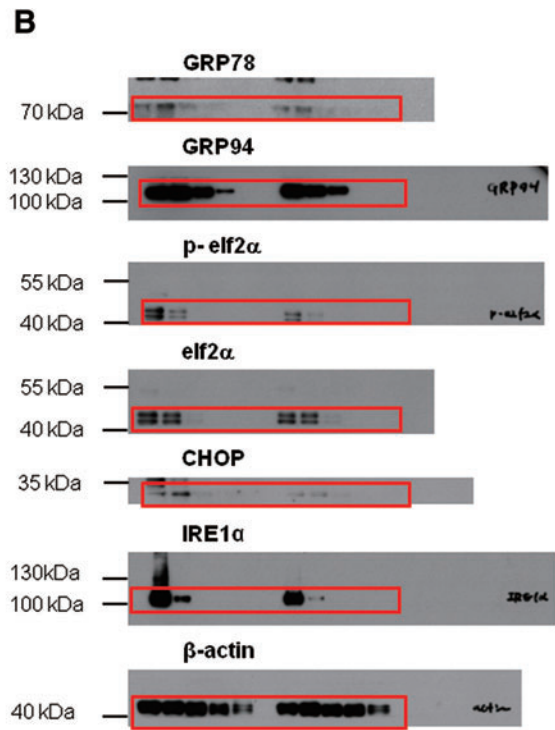

SUPPLEMENTARY FIG. S6. Unedited blots for Figure 1D and E.

Supplement: Supp_Fig6.pdf [file Supp_Fig6.pdf]

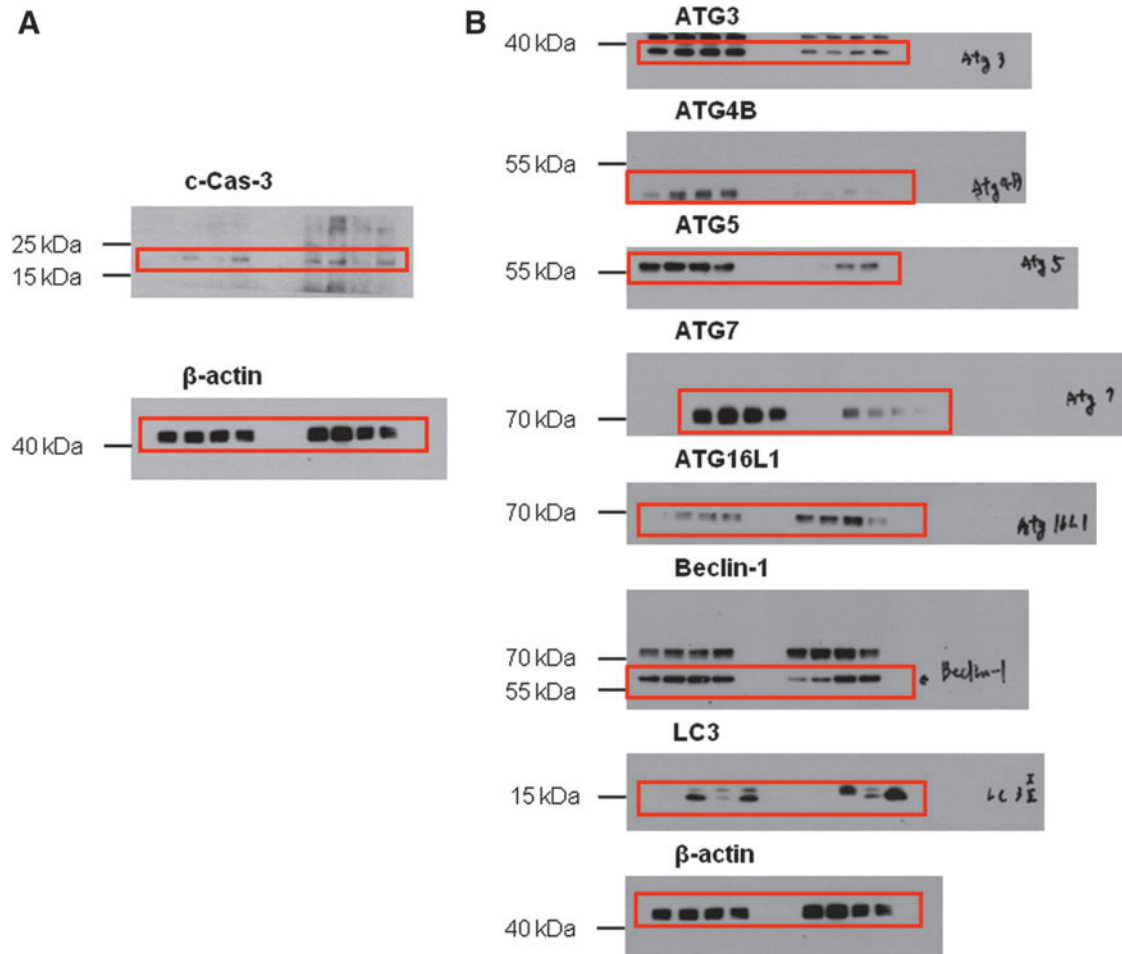

**SUPPLEMENTARY FIG. S9.** Unedited blots for Figure 3B and D.

Supplement: Supp_Fig9.pdf [file Supp_Fig9.pdf]
